46. Ibrahim MM, Porreca F, Lai J, Albrecht PJ, Rice FL, Khodorova A, Davar G, Makriyannis A, Vanderah TW, Mata HP, Malan TP Jr: CB2 cannabinoid receptor activation produces antinociception by stimulating peripheral release of endogenous opioids. *Proc Natl Acad Sci U S A* 2005; 102:3093–8
47. Mascia F, Mariani V, Giannetti A, Girolomoni G, Pastore S: House dust mite allergen exerts no direct proinflammatory effects on human keratinocytes. *J Allergy Clin Immunol* 2002; 109:532–8
48. Wang L, Luo J, Fu Y, He S: Induction of interleukin-8 secretion and activation of ERK1/2, p38 MAPK signaling pathways by thrombin in dermal fibroblasts. *Int J Biochem Cell Biol* 2006; 38:1571–83
49. Rosenberger J, Petrovics G, Buzas B: Oxidative stress induces proorphanin FQ and proenkephalin gene expression in astrocytes through p38- and ERK-MAP kinases and NF-kappaB. *J Neurochem* 2001; 79:35–44
50. Morrow DA, Braunwald E, Bonaca MP, Ameriso SF, Dalby AJ, Fish MP, Fox KA, Lipka LJ, Liu X, Nicolau JC, Ophuis AJ, Paolasso E, Scirica BM, Spinar J, Theroux P, Wiviott SD, Strony J, Murphy SA; TRA 2P-TIMI 50 Steering Committee and Investigators: Vorapaxar in the secondary prevention of atherothrombotic events. *N Engl J Med* 2012; 366:1404–13
51. Strande JL, Hsu A, Su J, Fu X, Gross GJ, Baker JE: SCH 79797, a selective PAR1 antagonist, limits myocardial ischemia/reperfusion injury in rat hearts. *Basic Res Cardiol* 2007; 102:350–8
52. Coughlin SR: Protease-activated receptors in hemostasis, thrombosis and vascular biology. *J Thromb Haemost* 2005; 3:1800–14

## ANESTHESIOLOGY REFLECTIONS FROM THE WOOD LIBRARY-MUSEUM

### “Hands-On” Teaching by Chevalier Jackson

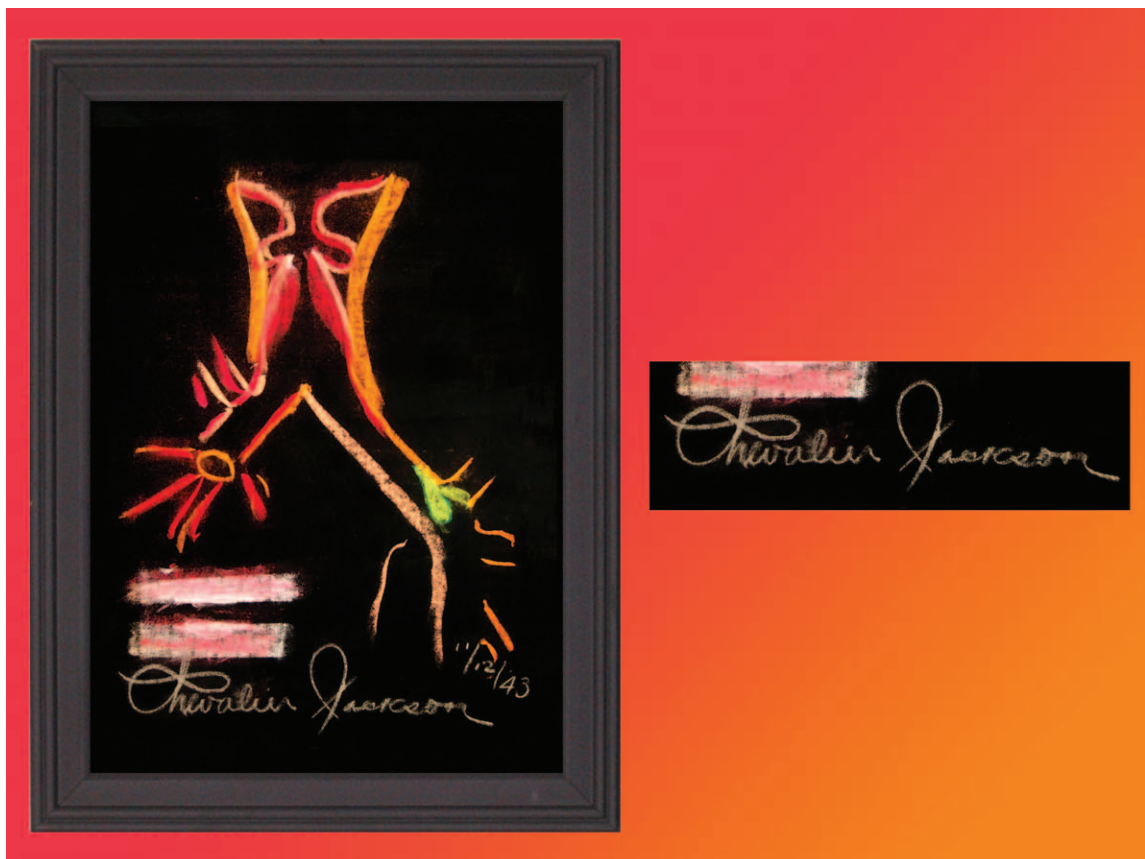

Nearly 40 years after inventing his namesake “U-shaped” laryngoscope, Chevalier Jackson, M.D. (1865–1958) emerged from clinical retirement to teach “broncho-esophagology” during World War II to postgraduates at Temple University in Philadelphia. The ambidextrous “Chev” Jackson would turn his back to the class and, with chalk sticks in both hands, simultaneously draw out the left and right halves of any teaching diagrams on the blackboard or on poster paper. He accomplished a similar two-handed feat in 1943 by creating this pastel (*left*) of the upper airway and the bronchial branches. Since Dr. Jackson could sign his name with either hand or simultaneously, from opposite ends of his signature, with both hands, please inspect his autograph on this piece (*right*) and decide for yourself: did Dr. Jackson use one hand or two? This pastel is part of the Wood Library-Museum’s Nicholas Samponaro Collection. (Copyright © the American Society of Anesthesiologists, Inc.)

George S. Bause, M.D., M.P.H., *Honorary Curator, ASA’s Wood Library-Museum of Anesthesiology, Park Ridge, Illinois, and Clinical Associate Professor, Case Western Reserve University, Cleveland, Ohio. UJYC@aol.com.*
